# Supplementary material for: Effects of surface characteristics of dielectric layers on polymer thin-film transistors obtained by spray methods
Source: Royal Society of Chemistry journal article supplement (doi:10.1039/c3cp44017f), 2013-01-01
Supplement: c3cp44017f.pdf [file c3cp44017f.pdf]

## Supporting Information

# Effects of surface characteristics of dielectric layers on polymer thin-film transistors obtained by spray methods

**Hye-Yun Park,<sup>a</sup> Jun-Su Jin,<sup>b</sup> Sanggyu Yim,<sup>b</sup> Seung-Hwan Oh,<sup>c</sup> Phil-Hyun Kang,<sup>c</sup> Si-Kyung Choi,<sup>a\*</sup> Sung-Yeon Jang<sup>b\*</sup>**

*Hye-Yun Park,<sup>a</sup> Jun-Su Jin,<sup>b</sup> Sanggyu Yim,<sup>b</sup> Seung-Hwan Oh,<sup>c</sup> Phil-Hyun Kang,<sup>c</sup> Si-Kyung Choi,<sup>a\*</sup> Sung-Yeon Jang<sup>b\*</sup>*

*<sup>a</sup> Department of Materials Science and Engineering, Korea Advanced Institute of Science and Technology, Daejeon 305-701, Republic of Korea*

*<sup>b</sup> Department of Chemistry, Kookmin University, 861-1, Jeongneung-Dong, Seongbuk-Gu, Seoul 136-702, Republic of Korea*

*<sup>c</sup> Radiation Research Division for Industry and Environment, Korea Atomic Energy Research Institute (KAERI), 29 Geumgu-gil, Jeongeup-si, Jeollabuk-do 580-185, Korea*

\*Corresponding Author. Tel/Fax: +82-(2)-910-5768/4415

E-mail address: syjang@kookmin.ac.kr

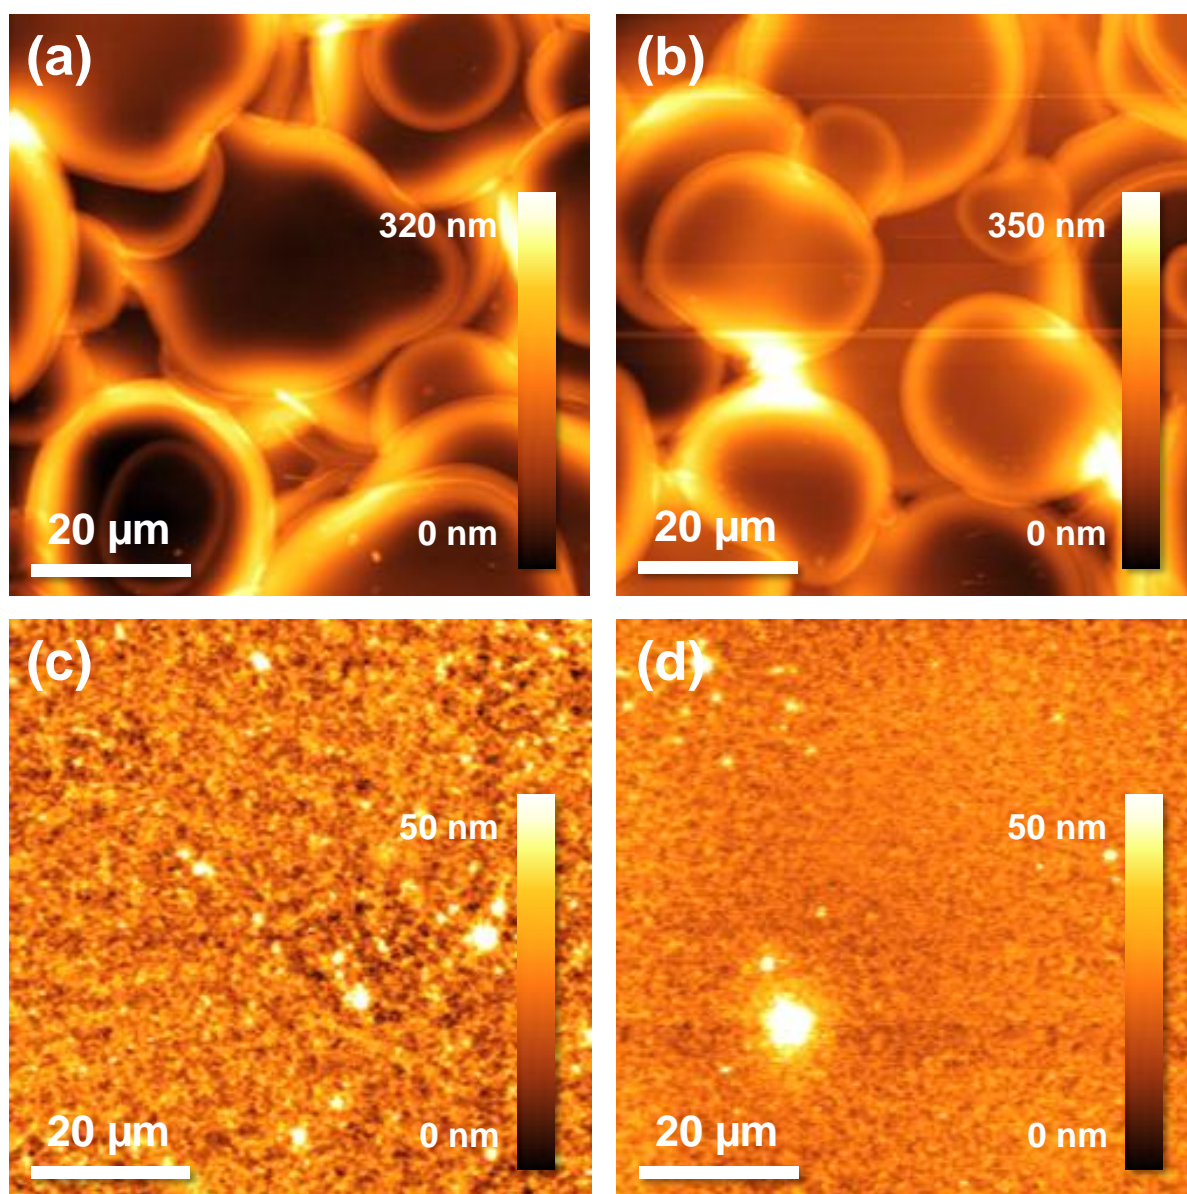

**Figure S1.** Contact mode AFM images of (a) as-sprayed P3HT films on the OTS/SiO<sub>2</sub> (b) as-sprayed P3HT films on the SiO<sub>2</sub> (c) SSO treated P3HT films on the OTS/SiO<sub>2</sub> and (d) SSO treated P3HT films on the SiO<sub>2</sub>.

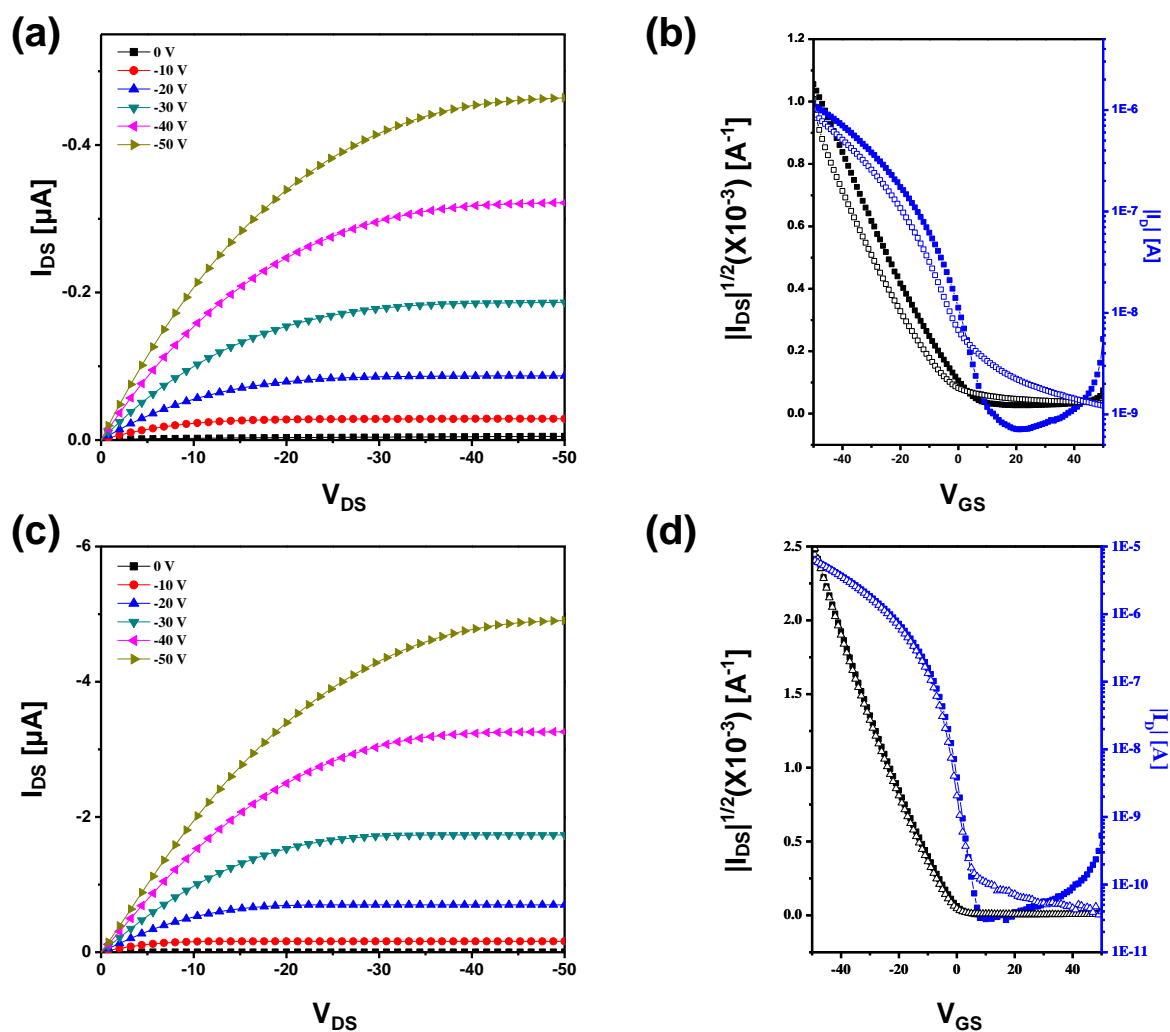

**Figure S2.** Output curve of (a) as-sprayed OFET on the OTS/SiO<sub>2</sub>, (c) SSO treated OFET on the OTS/SiO<sub>2</sub>. Transfer curve of (b) as-sprayed OFET on the OTS/SiO<sub>2</sub>, (d) SSO treated OFET on the OTS/SiO<sub>2</sub>. The closed symbol in transfer curve was obtained the forward scans and open symbols, backward scans.

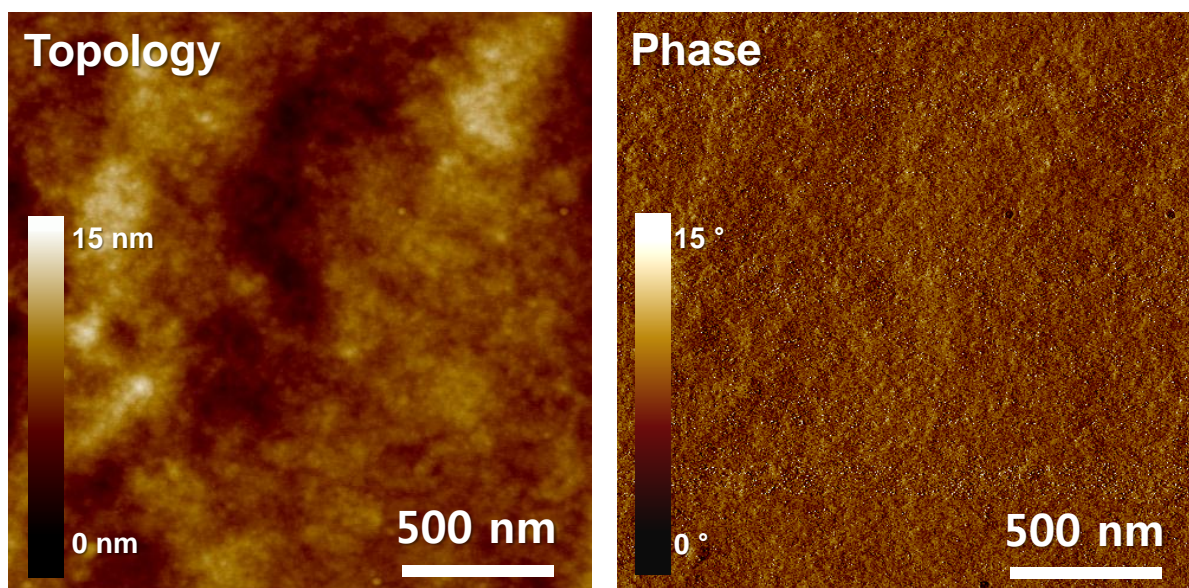

**Figure S3.** TM-AFM images of as sprayed P3HT on the OTS/SiO<sub>2</sub>
